# Supplementary material for: Association between Dietary Patterns and Handgrip Strength: Analysis of the Korean National Health and Nutrition Examination Survey Data Between 2014 and 2017
Source: PubMed Central journal article supplement (PMC7601920; doi:10.3390/nu12103048), 2020-10-05
Supplement: nutrients-12-03048-s001.pdf [file nutrients-12-03048-s001.pdf]

**Table S1.** General differences in 10–18-year-old children and adolescents according to gender and age.

|                     | Gender         |                 |             | Age         |             |                |
|---------------------|----------------|-----------------|-------------|-------------|-------------|----------------|
|                     | All            | Boys            | Girls       | 10~12yr     | 13~15yr     | 16~18yr        |
| N                   | 2327           | 1223            | 1104        | 865         | 807         | 655            |
| Age                 | 14.2 ± 0.1     | 14.2 ± 0.1      | 14.2 ± 0.1  | 11.0 ± 0.0  | 14.1 ± 0.0  | 16.9 ± 0.0***  |
| BMI                 | 20.9 ± 0.1     | 21.1 ± 0.1**    | 20.6 ± 0.1  | 19.2 ± 0.1  | 21.1 ± 0.1  | 22.1 ± 0.2***  |
| 95th %tile ≤<br>BMI | 329<br>(14.1%) | 200 (16.3%)*    | 129 (12.6%) | 77 (9.1%)   | 119 (13.7%) | 133 (19.6%)*   |
| HGS                 | 26.6 ± 0.3     | 30.9 ± 0.4***   | 21.9 ± 0.2  | 18.2 ± 0.2  | 28.3 ± 0.3  | 32.0 ± 0.4***  |
| SBP (mmHg)          | 108.4 ± 0.3    | 109.5 ± 0.34*** | 106.5 ± 0.4 | 106.3 ± 0.4 | 108.5 ± 0.4 | 109.9 ± 0.4*** |
| DBP (mmHg)          | 66.4 ± 0.2     | 66.8 ± 0.3***   | 65.9 ± 0.3  | 62.8 ± 0.3  | 66.0 ± 0.3  | 69.6 ± 0.4***  |

Values are presented as mean ± SE; BMI: body mass index; HGS: handgrip strength; BP: blood pressure; SBP: systolic blood pressure; DBP: diastolic blood pressure. \* *p*-values for differences using the analysis of variance for means; \* *p* < 0.05, \*\* *p* < 0.01, \*\*\* *p* < 0.001.
